# Supplementary material for: Transcranial ultrasound stimulation effect in the redundant and synergistic networks consistent across macaques
Source: PubMed Central journal article supplement (PMC11674579; doi:10.1162/netn_a_00388), 2024-12-10
Supplement: netn-8-4-1032-s001.pdf [file netn-8-4-1032-s001.pdf]

RESEARCH

## **Transcranial ultrasound stimulation effect in the redundant and synergistic networks consistent across macaques**

**Marilyn Gatica<sup>1,2\*</sup>, Cyril Atkinson-Clement<sup>1</sup>, Pedro A. M. Mediano<sup>3,4</sup>,  
Mohammad Alkhawashki<sup>1</sup>, James Ross<sup>1</sup>, Jérôme Sallet<sup>5,6</sup>, and Marcus Kaiser<sup>1,7,8</sup>**

<sup>1</sup>Precision Imaging, School of Medicine, University of Nottingham, United Kingdom

<sup>2</sup>NPLab, Network Science Institute, Northeastern University London, London, United Kingdom

<sup>3</sup>Department of Computing, Imperial College London, London, United Kingdom

<sup>4</sup>Division of Psychology and Language Sciences, University College London, London, United Kingdom

<sup>5</sup>Wellcome Centre for Integrative Neuroimaging (WIN), Department of Experimental Psychology, University of Oxford, Oxford, United Kingdom

<sup>6</sup>Univ Lyon, Université Lyon 1, Inserm, Stem Cell and Brain Research Institute U1208, Bron, France

<sup>7</sup>School of Computing Science, Newcastle University, United Kingdom

<sup>8</sup>Rui Jin Hospital, Shanghai Jiao Tong University, Shanghai, China

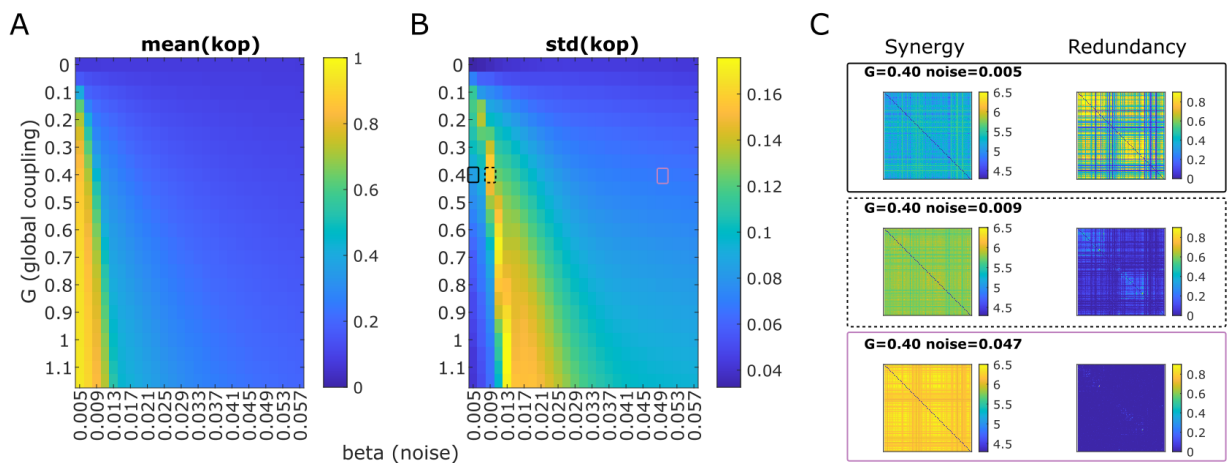

1 **Figure 1.** Hopf model simulations with  $N = 140$  oscillators coupled with an average structural connectivity (across the three macaques), varying the  
 2 parameters global coupling ( $G$ ) and noise ( $\beta$ ). **A:** The mean of the kuramoto order parameter (KOP) quantifying synchrony. **B:** The standard deviation of the  
 3 KOP, as a measure of metastability. **C:** Redundant and synergistic matrices for  $G = 0.4$  and three noise values.

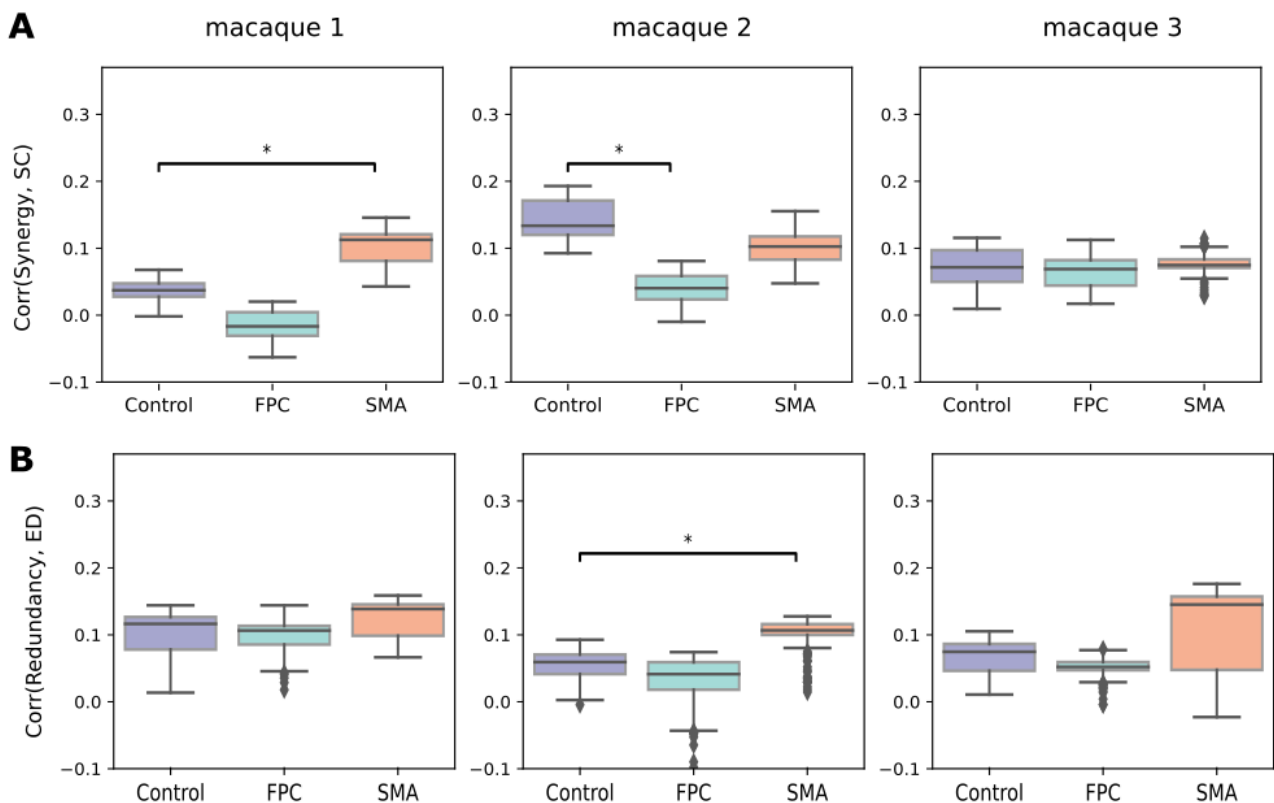

4 **Figure 2.** **A:** Correlation between the structural connectivity (SC) and the synergy. **B:** Correlation between the Euclidean distance (ED) and redundancy  
 5 per experiment and macaque. The y-axis values contain the Spearman's rank correlation coefficient. The colors represent the control (non-TUS) and the two  
 6 experiments: SMA-TUS and FPC-TUS. We corrected by Bonferroni and effect size bigger than 0.8.

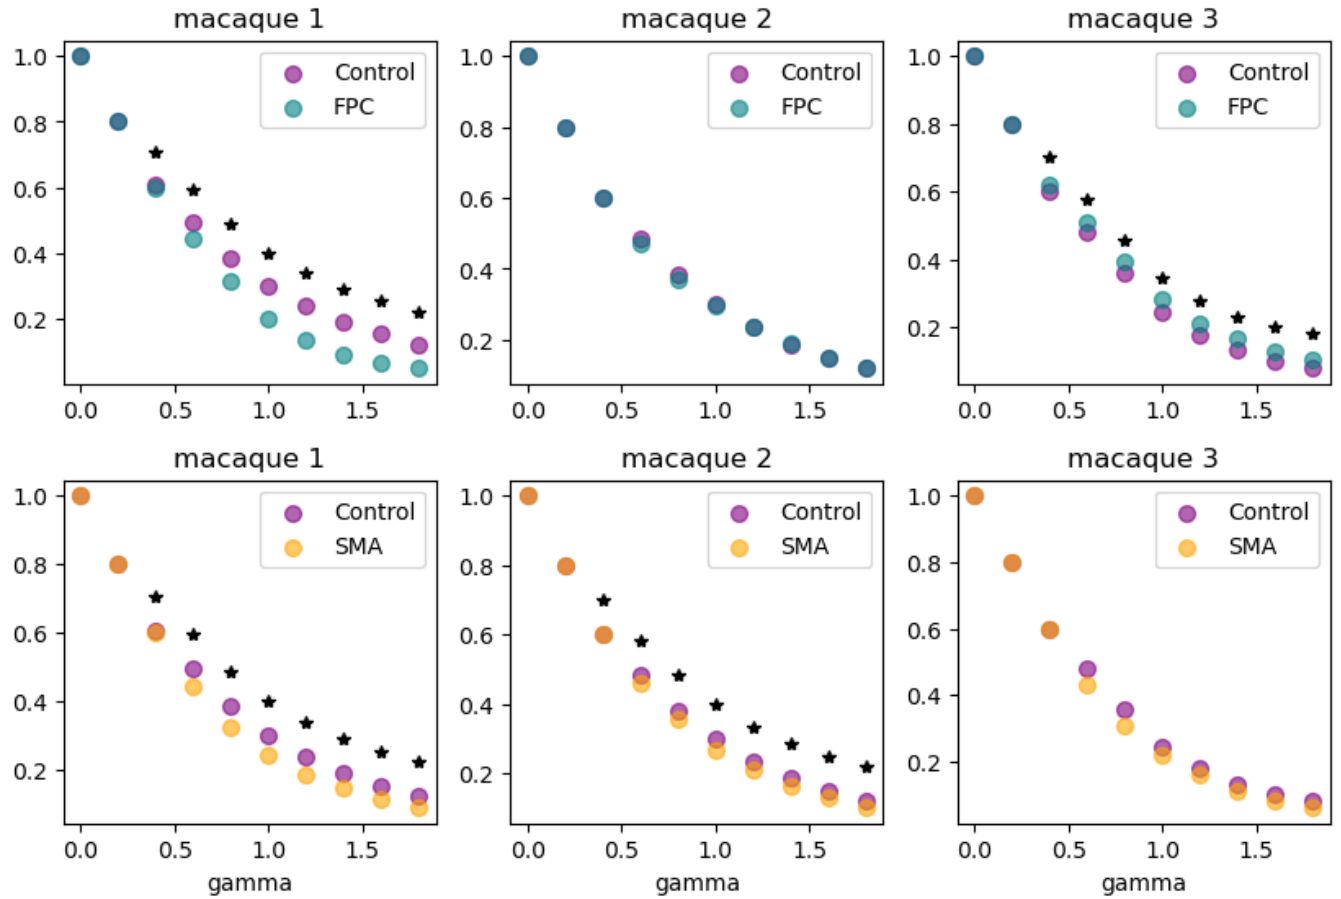

7 **Figure 3.** Median modularity value (segregation) of the redundancy matrix, per macaque and experiment. The modularity detection algorithm includes one  
 8 free parameter, gamma, which controls the resolution of the clusters. Larger clusters are detected when gamma is between 0 and 1, while values greater than  
 9 one result in smaller clusters. Per each parameter gamma, we computed the Wilcoxon rank-sum test to compare controls and the experiment (second row:  
 10 SMA-TUS, first row: FPC-TUS). Te asterisk marks represent the significant differences (p-values corrected by Bonferroni and effect size bigger than 0.8).

### **Supplementary materials and methods**

We simulated the brain activity using a supercritical Hopf bifurcation model (Stuart-Landau oscillators)(Coronel-Oliveros et al., 2024; Deco et al., 2019). The following ordinary differential equations define the dynamic per each node  $i$ :

$$\begin{aligned}\frac{dx_i(t)}{dt} &= a_i x_i(t) - [x_i^2(t) - y_i^2(t)] x_i(t) - w_i y_i(t) + G \sum_{j=1}^n M_{ij} (x_j(t) - x_i(t)) + \beta \eta_i(t) \\ \frac{dy_i(t)}{dt} &= a_i y_i(t) - [x_i^2(t) - y_i^2(t)] y_i(t) - w_i x_i(t) + G \sum_{j=1}^n M_{ij} (y_j(t) - y_i(t)) + \beta \eta_i(t)\end{aligned}$$

Where  $y(t)$  corresponds to the imaginary component, and the real component of the time series,  $x(t)$ , simulated the BOLD-like signals. We set the oscillation frequency  $f_i = 0.05$  Hz for overall nodes and the bifurcation parameter  $a = 2$ . The brain areas are coupled with the structural connectivity  $M$  (computed as the average structural connectivities across the three macaques).  $G$  represents the global coupling, and  $\eta_i(t)$ , with  $\beta$  the standard deviation, the external Gaussian noise. We ran 17 minute simulations with an integration step of 100ms in the Euler-Maruyama integration scheme. The simulated time series were band-pass filtered between 0.0025 and 0.05 Hz, as in the empirical data. We used the Python code to simulate the Hopf model, freely available at:

<https://github.com/carlosmig/StarCraft-2-Modeling.git> (Coronel-Oliveros et al., 2024)

## **REFERENCES**

- Coronel-Oliveros, C., Medel, V., Orellana, S., Rodiño, J., Lehue, F., Cruzat, J., ... Ibáñez, A. (2024). Gaming expertise induces meso-scale brain plasticity and efficiency mechanisms as revealed by whole-brain modeling gaming expertise, neuroplasticity and functional dynamics. *Neuroimage*. doi: 10.1016/j.neuroimage.2024.120633
- Deco, G., Cruzat, J., Cabral, J., Tagliazucchi, E., Laufs, H., Logothetis, N. K., & Kringelbach, M. L. (2019). Awakening: Predicting external stimulation to force transitions between different brain states. *Proceedings of the National Academy of Sciences of the United States of America*. doi: 10.1073/pnas.1905534116
